# Supplementary material for: Coupling numerical models of deltaic wetlands with AirSWOT, UAVSAR, and AVIRIS-NG remote sensing data
Source: Copernicus journal article supplement (doi:10.5194/bg-21-241-2024), 2024-01-16
Supplement: Supplementary file 1 [file bg-21-241-2024-supplement.pdf]

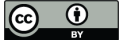

*Supplement of*

## **Coupling numerical models of deltaic wetlands with AirSWOT, UAVSAR, and AVIRIS-NG remote sensing data**

**Luca Cortese et al.**

*Correspondence to:* Luca Cortese (lucacort@bu.edu) and Xiaohe Zhang (zhangbu@bu.edu)

The copyright of individual parts of the supplement might differ from the article licence.

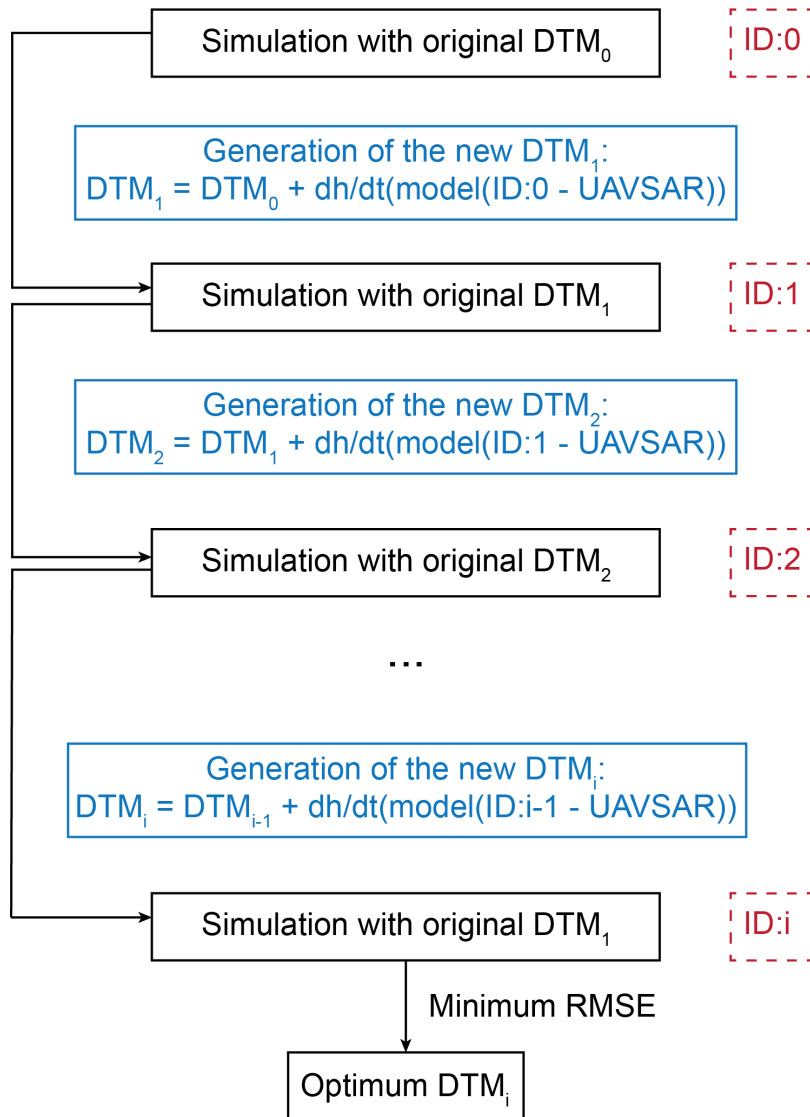

**Figure S1.** Flow diagram of the bathymetry calibration procedure using UAVSAR. The term  $dh/dt$  symbolizes the water level change. The figure is adapted from Figure 3 in Zhang et al. (2022a).

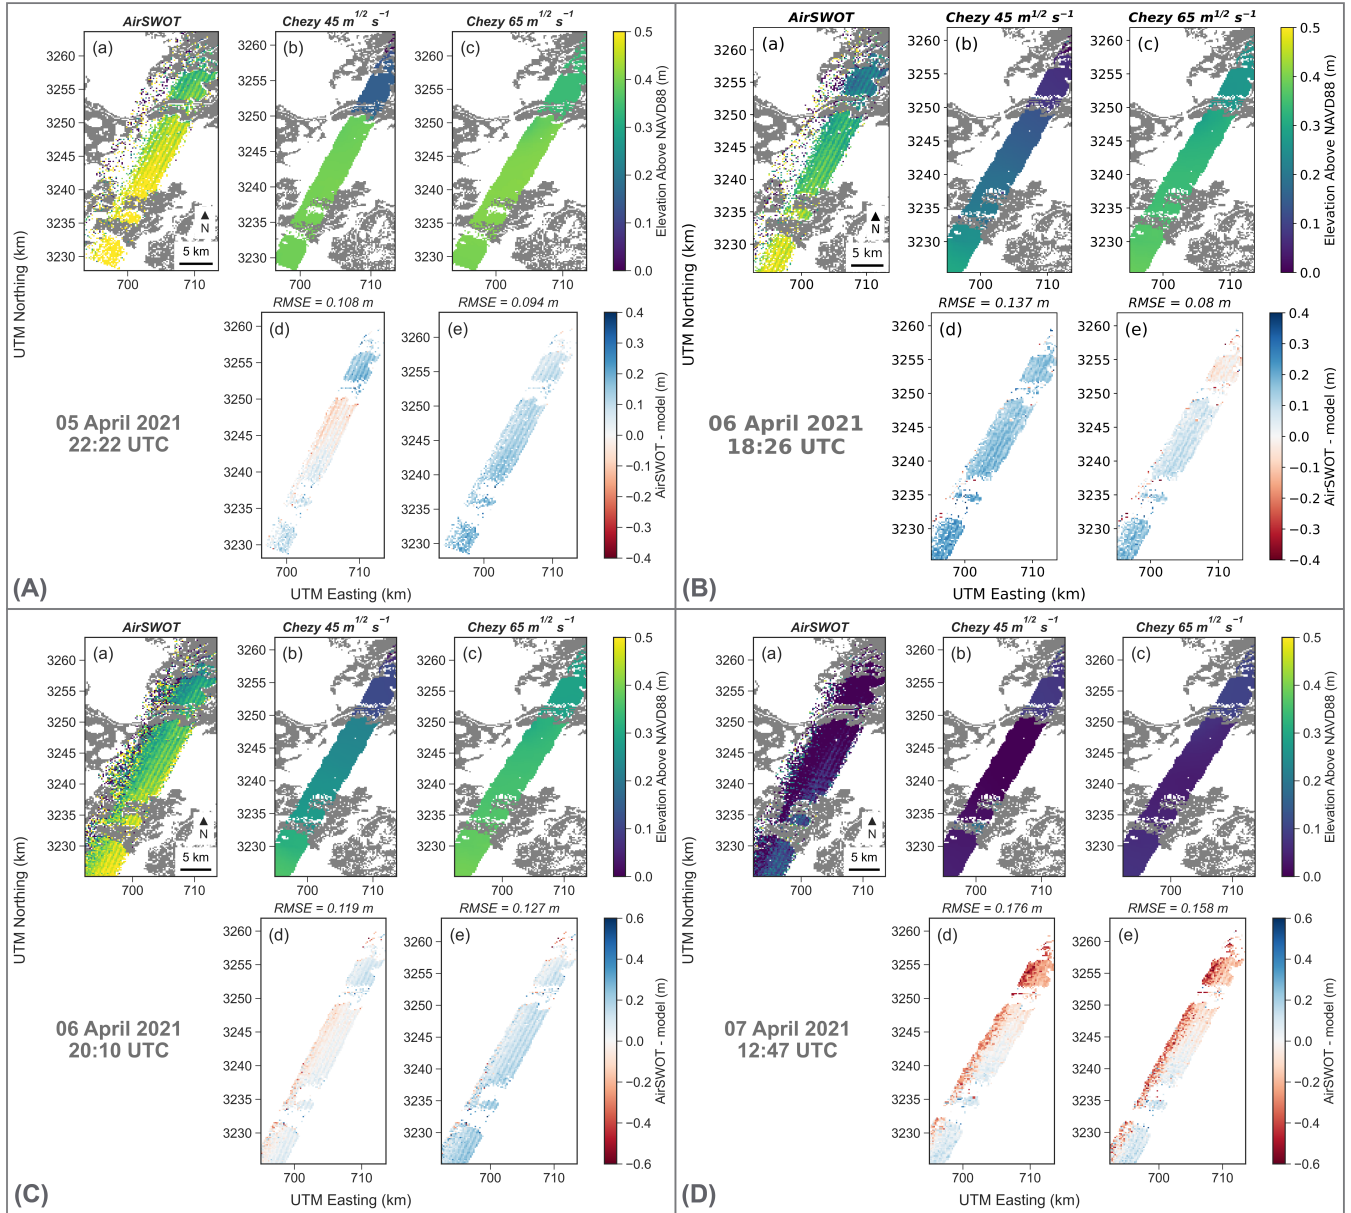

**Figure S2.** Comparison between AirSWOT and modelled water levels in 4 different times for the same flight line. In each panel, (a) is the measurements from AirSWOT, (b) and (c) the modelled water levels with friction coefficient of 45 and 65  $\text{m}^{1/2}\text{s}^{-1}$  respectively, (d) and (e) the errors in the 45 and 65  $\text{m}^{1/2}\text{s}^{-1}$  cases respectively.

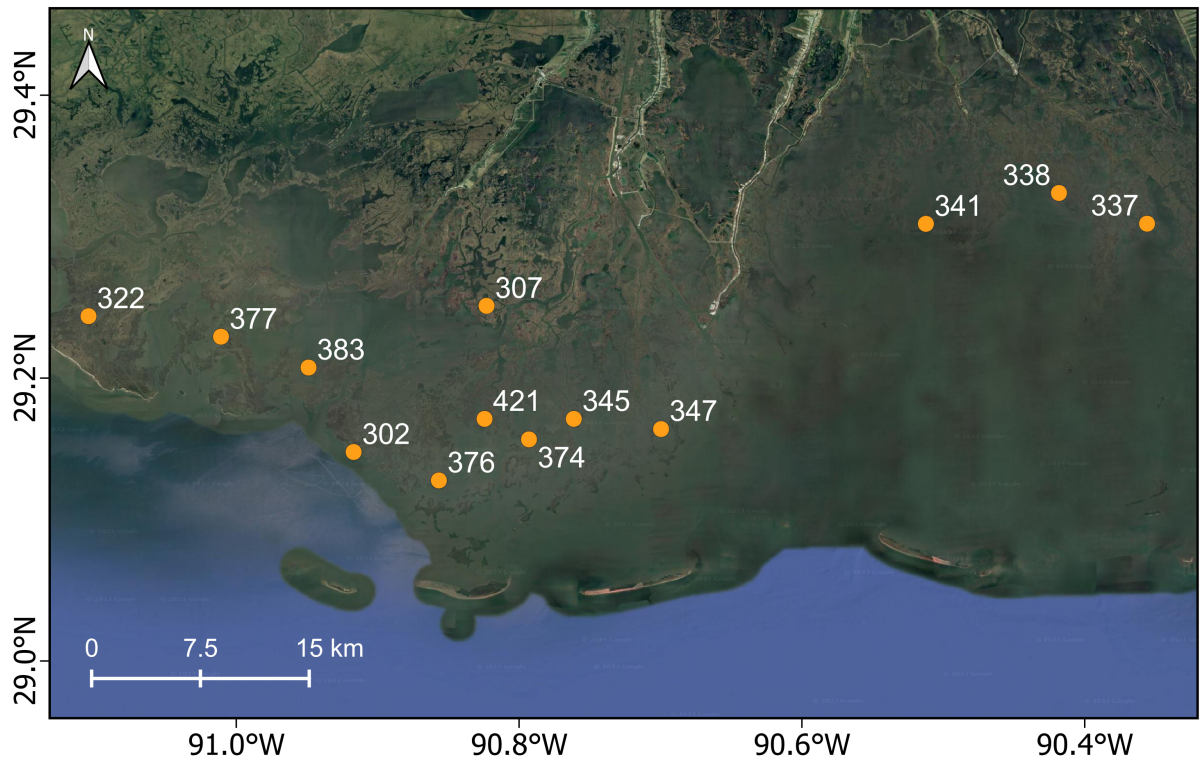

**Figure S3.** Location of the CRMS stations used in the separate calibration using only in-situ measurements. The same stations are use for the comparison of the two calibrations. Basemap credit: ©Google Satellite.

**Calibration with in-situ measurements (Delta-X Spring 2021 campaign)**

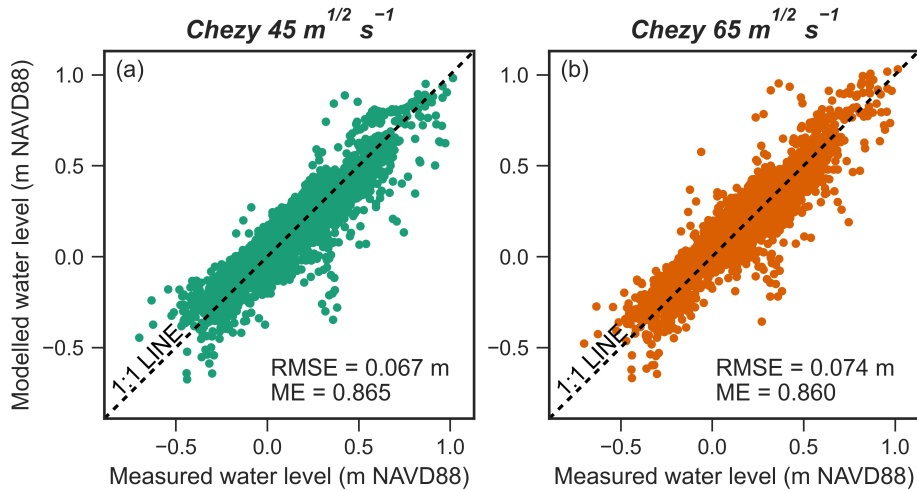

**Validation with in-situ measurements (Delta-X Fall 2021 campaign)**

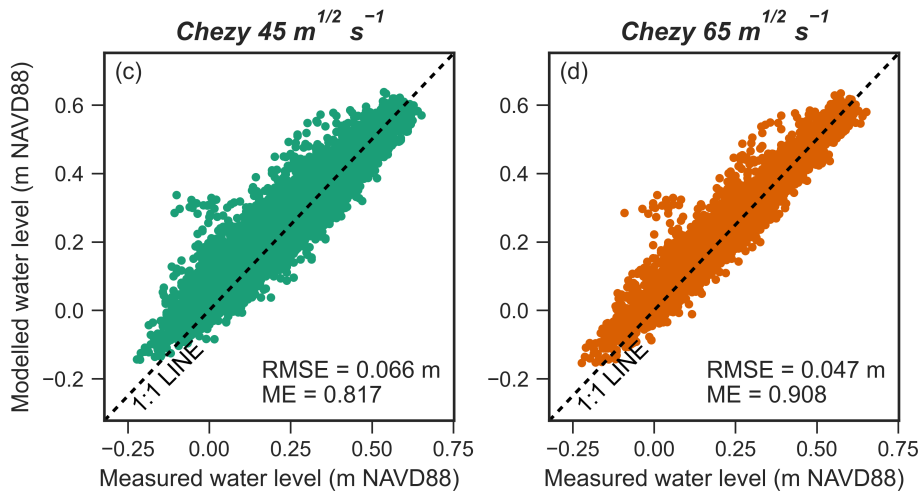

**Figure S4.** Calibration and validation of the water levels using in-situ measurements. The first row shows the water levels comparison for the calibration period during the Delta-X Spring 2021 campaign. The second row shows the water levels during the Delta-X Fall 2021 campaign.

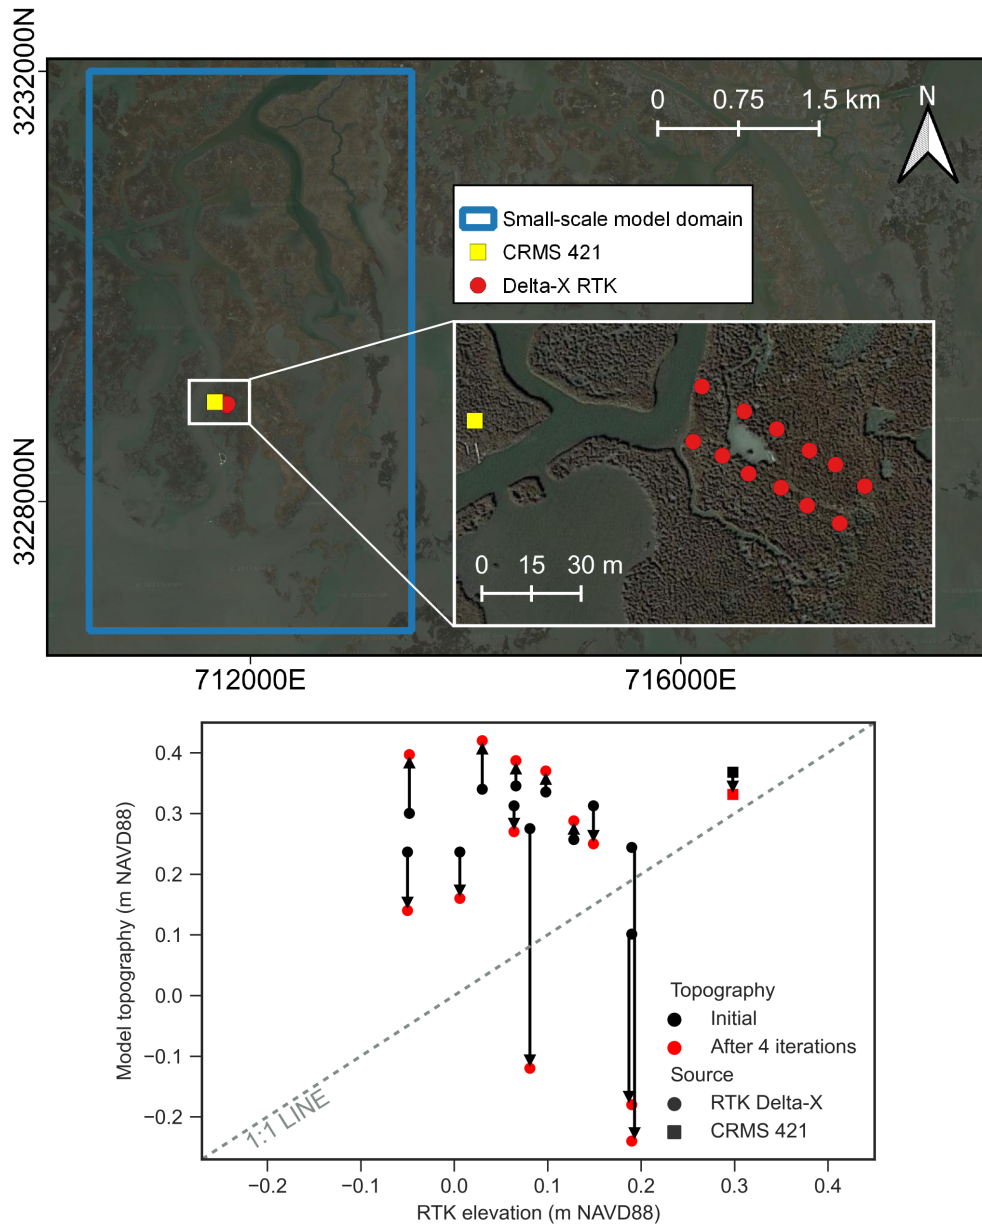

**Figure S5.** Validation of the topographic correction. The map at the top shows the location of the in-situ elevation measurements inside the small-scale model domain. The bottom plot shows if the correction based on UAVSAR was able to improve the elevation. Basemap credit: ©Google Satellite.

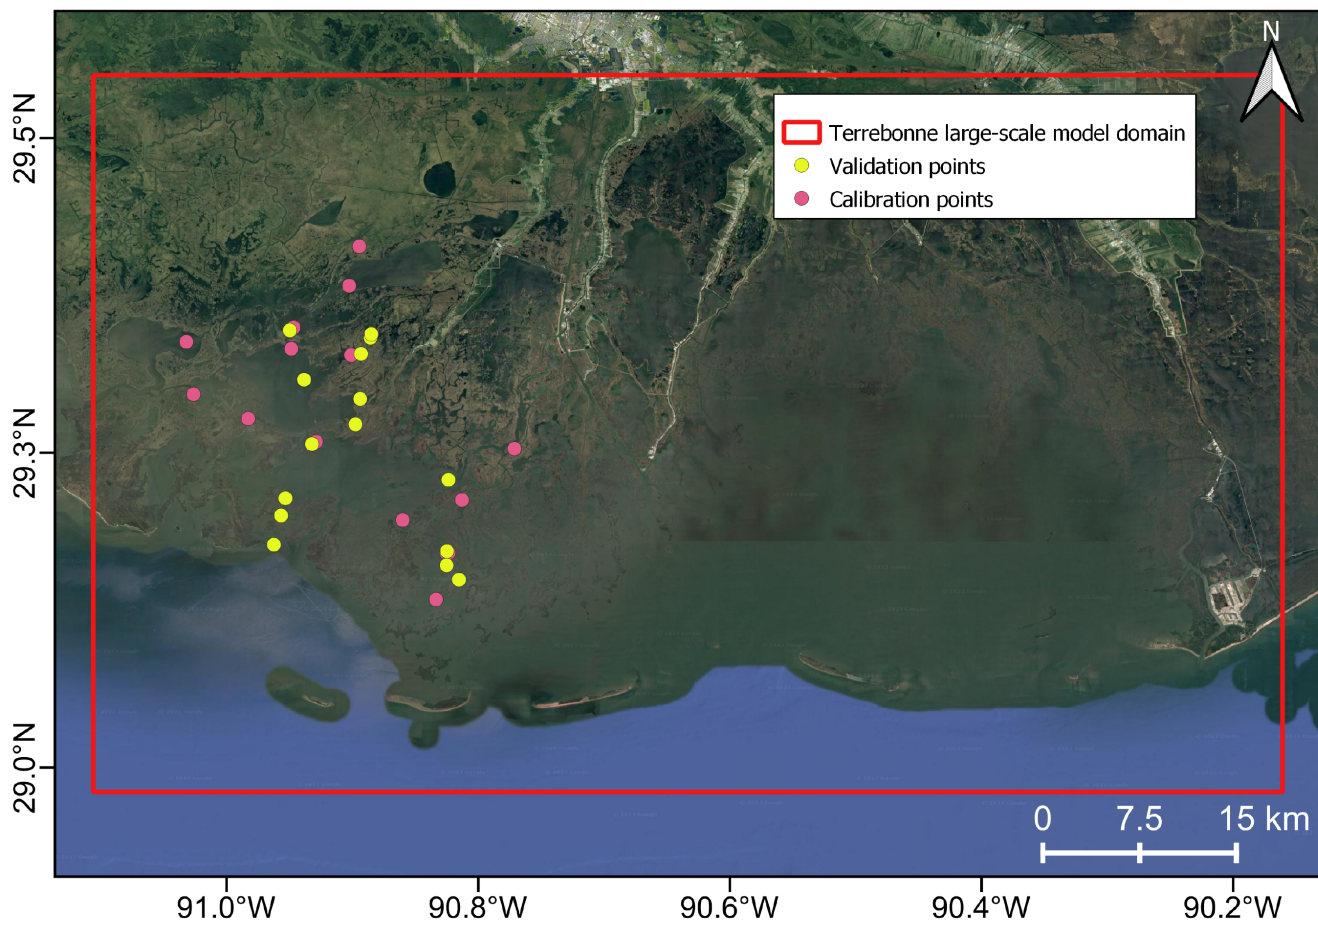

**Figure S6.** Location of the TSS samples used for the sediment parameter calibration and validation with in-situ measurements. The red rectangle shows the Terrebonne large-scale model boundaries. Basemap credit: ©Google Satellite.

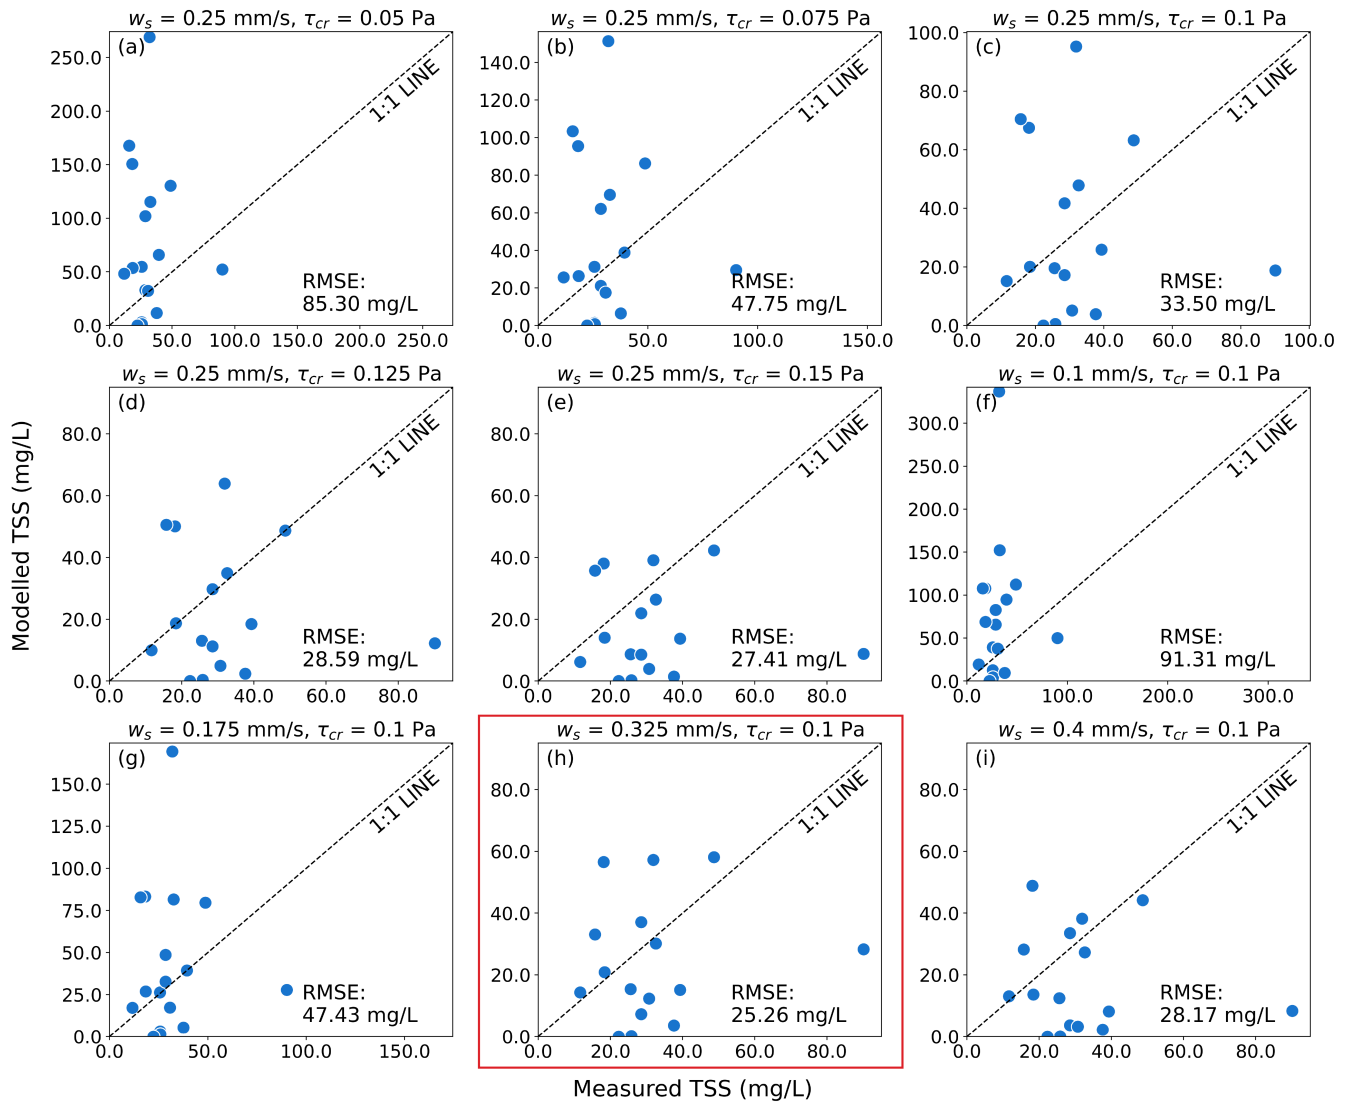

**Figure S7.** Comparison between in-situ measurements and modelled sediment concentration in the calibration of the sediment transport. Data were collected during the Delta-X Spring 2021 campaign. The red rectangle indicates the best case.



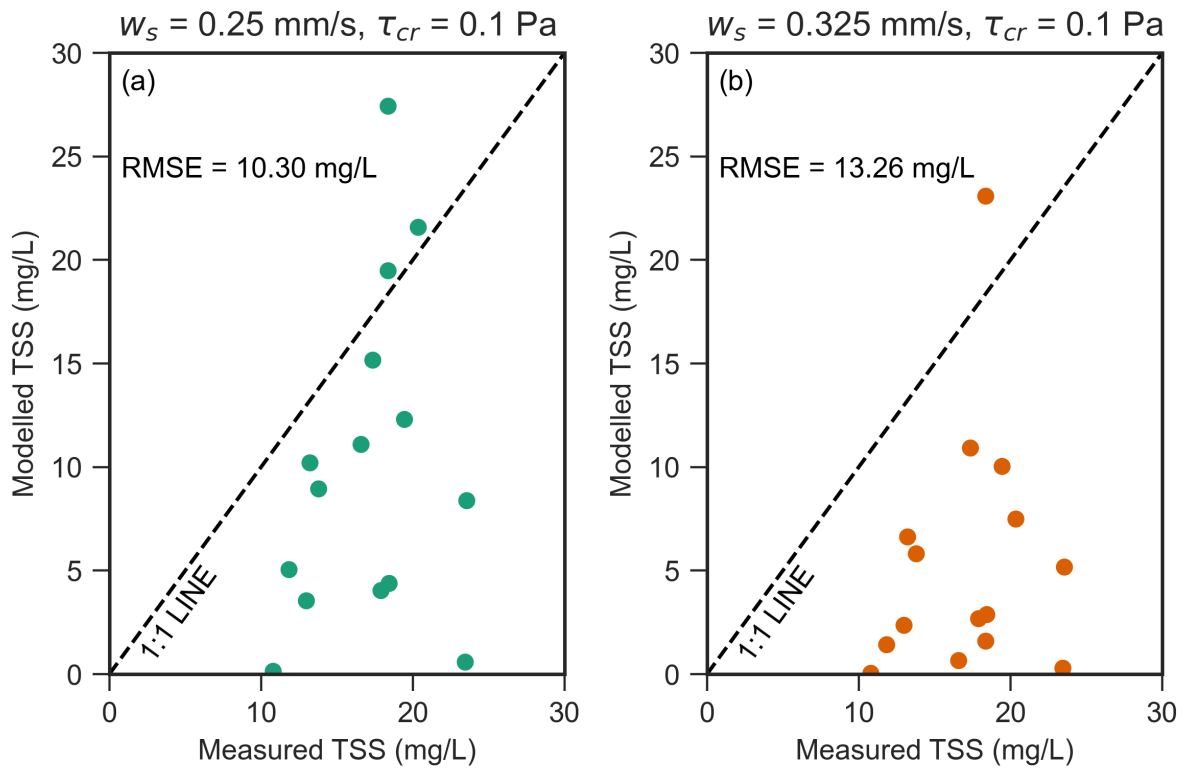

**Figure S8.** Comparison between in-situ measurements and modelled sediment concentration in the calibration of the sediment transport. Data were collected during the Delta-X Fall 2021 campaign.
